# Supplementary material for: HIV latency reversing agents act through Tat post translational modifications
Source: PubMed Central journal article supplement (PMC5948896; doi:10.1186/s12977-018-0421-6), 2018-05-11
Supplement: 12977_2018_421_MOESM4_ESM.pdf [file 12977_2018_421_MOESM4_ESM.pdf]

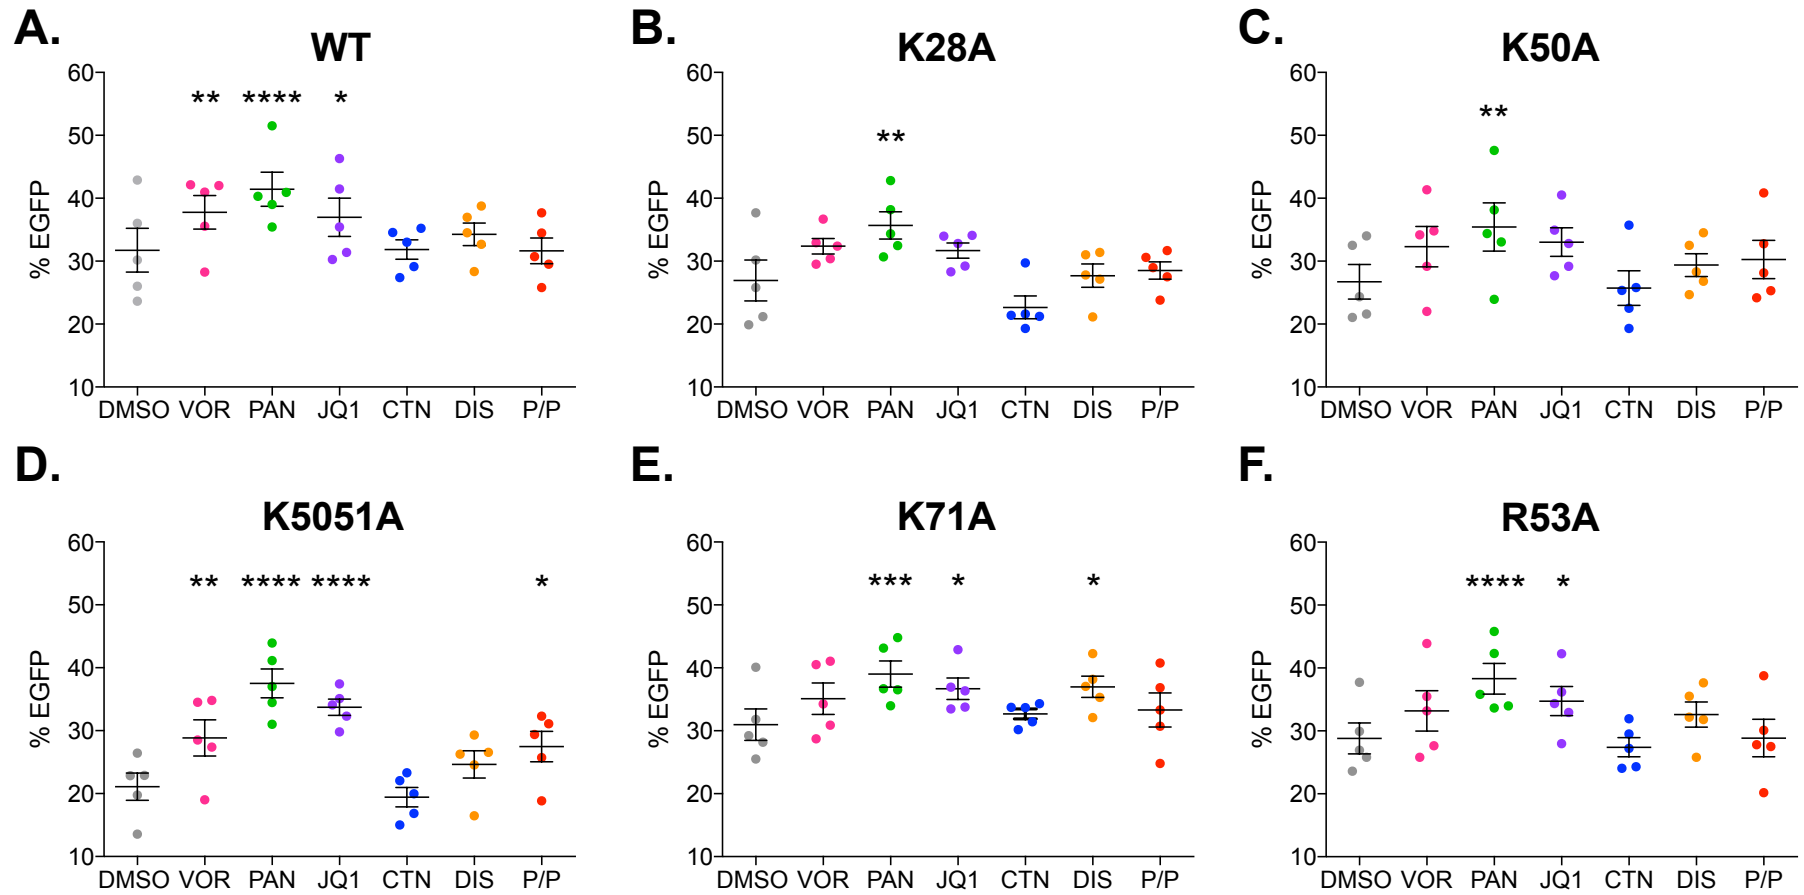

**Figure S4**
